## **Correction: Combined Impact of Health Behaviours and Mortality in Men and Women: The EPIC-Norfolk Prospective Population Study**

Kay-Tee Khaw, Nicholas Wareham, Sheila Bingham, Ailsa Welch, Robert Luben, Nicholas Day

Correction for:

Khaw KT, Wareham N, Bingham S, Welch A, Luben R, et al. (2008) Combined impact of health behaviours and mortality in men and women: The EPIC-Norfolk Prospective Population Study. *PLoS Med* 5(1): e12. doi:10.1371/journal.pmed.0050012

An error was made with the cutoff vitamin C level reported in this paper (>50 mmol/l). The units should have been given in micromoles per litre, not millimoles per litre, for vitamin C. Throughout the manuscript, wherever >50 mmol/l is given as the cutoff, >50 micromol/l is the correct vitamin C level that should have been reported.

Citation: Khaw KT, Wareham N, Bingham S, Welch A, Luben R, et al. (2008) Combined impact of health behaviours and mortality in men and women: The EPIC-Norfolk Prospective Population Study. *PLoS Med* 5(3): e70. doi:10.1371/journal.pmed.0050070

Received: February 6, 2008; Accepted: February 6, 2008; Published: March 25, 2008.

Copyright: © 2008 Khaw et al. This is an open-access article distributed under the terms of the Creative Commons Attribution License, which permits unrestricted use, distribution, and reproduction in any medium, provided the original author and source are credited.
